# Supplementary material for: Deprescribing of antidepressants: development of indicators of high-risk and overprescribing using the RAND/UCLA Appropriateness Method
Source: PubMed Central journal article supplement (PMC11089726; doi:10.1186/s12916-024-03397-w), 2024-05-13
Supplement: 12916_2024_3397_MOESM2_ESM.pdf [file 12916_2024_3397_MOESM2_ESM.pdf]

**DEPRESCRIBING OF ANTIDEPRESSANTS: DEVELOPMENT OF INDICATORS OF  
HIGH-RISK AND OVERPRESCRIBING USING THE RAND/UCLA  
APPROPRIATENESS METHOD**

**Additional file 2:** Expert ratings of round two of the RAM-Survey for high-risk prescribing

**eTable 2:** Expert ratings of round two of the RAM-Survey for high-risk prescribing

Indicators of potential high-risk prescribing

|                                                                                                                                                                                                                                        | Necessity to review                        |                                                 |                                                |        | Likelihood of harm<br>Median | Severity of harm<br>Median |
|----------------------------------------------------------------------------------------------------------------------------------------------------------------------------------------------------------------------------------------|--------------------------------------------|-------------------------------------------------|------------------------------------------------|--------|------------------------------|----------------------------|
|                                                                                                                                                                                                                                        | Nr. of experts rating: Not necessary (1-3) | Nr. of experts rating: Might be necessary (4-6) | Nr. of experts rating: Clearly necessary (7-9) | Median |                              |                            |
| <b>A. ADR Exacerbation of heart failure</b>                                                                                                                                                                                            |                                            |                                                 |                                                |        |                              |                            |
| 1. Chronic heart failure and prescribed any antidepressant.                                                                                                                                                                            | 1                                          | 6                                               | 3                                              | 5      | 5                            | 5                          |
| 2. Chronic heart failure and prescribed TCA.                                                                                                                                                                                           | 0                                          | 0                                               | 10                                             | 8      | 7                            |                            |
| 3. Chronic heart failure and prescribed SNRI.                                                                                                                                                                                          | 1                                          | 3                                               | 6                                              | 7      | 5                            |                            |
| 4. Chronic heart failure and prescribed SSRI.                                                                                                                                                                                          | 1                                          | 6                                               | 3                                              | 5      | 4                            |                            |
| 5. Chronic heart failure and prescribed TCA in doses < 50 mg/day.                                                                                                                                                                      | 2                                          | 6                                               | 2                                              | 6      | 3                            |                            |
| 6. Chronic heart failure and prescribed TCA in doses ≥ 50 mg/day but < 100mg/day.                                                                                                                                                      | 1                                          | 2                                               | 7                                              | 7      | 6                            |                            |
| 7. Chronic heart failure and prescribed TCA ≥ 100 mg/day but < 200 mg/day.                                                                                                                                                             | 0                                          | 1                                               | 9                                              | 8      | 7                            |                            |
| 8. Chronic heart failure and prescribed TCA ≥ 200 mg/day.                                                                                                                                                                              | 0                                          | 0                                               | 10                                             | 9      | 8                            |                            |
| <b>A. ADR Exacerbation of coronary heart disease</b>                                                                                                                                                                                   |                                            |                                                 |                                                |        |                              |                            |
| 9. Aged < 65 years with coronary heart disease and prescribed TCA.                                                                                                                                                                     | 1                                          | 4                                               | 5                                              | 7      | 5                            | 6                          |
| 10. Aged ≥ 65 years with coronary heart disease and prescribed TCA.                                                                                                                                                                    | 0                                          | 1                                               | 9                                              | 8      | 7                            |                            |
| 11. Coronary heart disease and prescribed TCA in doses < 50 mg/day.                                                                                                                                                                    | 2                                          | 6                                               | 2                                              | 6      | 3                            |                            |
| 12. Coronary heart disease and prescribed TCA in doses ≥ 50 mg/day but < 100mg/day.                                                                                                                                                    | 1                                          | 3                                               | 6                                              | 7      | 5                            |                            |
| 13. Coronary heart disease and prescribed TCA ≥ 100 mg/day but < 200 mg/day.                                                                                                                                                           | 0                                          | 2                                               | 8                                              | 8      | 7                            |                            |
| 14. Coronary heart disease and prescribed TCA ≥ 200 mg/day.                                                                                                                                                                            | 0                                          | 0                                               | 10                                             | 9      | 8                            |                            |
| <b>A. ADR QTc prolongation</b>                                                                                                                                                                                                         |                                            |                                                 |                                                |        |                              |                            |
| 15. Aged ≥ 65 years and prescribed a single drug with a <i>known</i> * risk of TdP and that drug is citalopram ≤ 20mg daily or escitalopram ≤ 10mg daily. (*see evidence document)                                                     | 1                                          | 8                                               | 1                                              | 5      | 4                            | 7                          |
| 16. Aged ≥ 65 years and prescribed a single drug with a <i>known</i> risk of TdP and that drug is citalopram > 20mg daily or escitalopram > 10mg daily.                                                                                | 0                                          | 4                                               | 6                                              | 7      | 5                            |                            |
| 17. Aged < 65 years and co-prescribed citalopram at a dose of > 20mg or escitalopram at a dose > 10mg and an interacting CYP2C19 Inhibitor (strong or moderate inhibitors according to the Flockhart Table*). (*see evidence document) | 1                                          | 6                                               | 3                                              | 6      | 5                            |                            |
| 18. Aged ≥ 65 years and co-prescribed citalopram at a dose of > 20mg or escitalopram at a dose > 10mg and an interacting CYP2C19 Inhibitor (strong or moderate inhibitors according to the Flockhart Table).                           | 0                                          | 2                                               | 8                                              | 7      | 7                            |                            |
| 19. Aged < 65 years and co-prescribed an antidepressant with a <i>known</i> risk of TdP and one or more further drugs with a risk of TdP.                                                                                              | 0                                          | 2                                               | 8                                              | 8      | 5                            |                            |
| 20. Aged < 65 years and co-prescribed an antidepressant with a <i>possible</i> * risk of TdP and one or more further drugs with a risk of TdP. (*see evidence document)                                                                | 2                                          | 2                                               | 6                                              | 7      | 4                            |                            |

|                                                                                                                                                                                  |   |   |    |   |   |   |
|----------------------------------------------------------------------------------------------------------------------------------------------------------------------------------|---|---|----|---|---|---|
| 21. Aged < 65 years and co-prescribed an antidepressant with a conditional* risk of TdP and one or more further drugs with a risk of TdP.                                        | 1 | 4 | 5  | 7 | 4 |   |
| 22. Aged ≥ 65 years and prescribed a single antidepressant with a <i>known</i> risk of TdP.                                                                                      | 0 | 8 | 2  | 5 | 5 |   |
| 23. Aged ≥ 65 years and co-prescribed an antidepressant with a <i>known</i> risk of TdP and one or more further drugs with a risk of TdP.                                        | 0 | 2 | 8  | 8 | 7 |   |
| 24. Aged ≥ 65 years and co-prescribed an antidepressant with a <i>possible</i> risk of TdP and one or more further drugs with a risk of TdP.                                     | 0 | 4 | 6  | 7 | 6 |   |
| 25. Aged ≥ 65 years and co-prescribed an antidepressant with a conditional risk of TdP and one or more further drugs with a risk of TdP.                                         | 1 | 3 | 6  | 7 | 5 |   |
| 26. Female, aged ≥ 65 years and prescribed a single antidepressant with a <i>known</i> risk of TdP.                                                                              | 0 | 4 | 6  | 7 | 6 |   |
| 27. Female, aged ≥ 65 years and co-prescribed an antidepressant with a <i>known</i> risk of TdP and one or more further drugs with a risk of TdP.                                | 0 | 1 | 9  | 8 | 6 |   |
| 28. Female, aged ≥ 65 years and co-prescribed an antidepressant with a <i>possible</i> risk of TdP and one or more further drugs with a risk of TdP.                             | 0 | 2 | 8  | 7 | 6 |   |
| 29. Female, aged ≥ 65 years and co-prescribed an antidepressant with a conditional risk of TdP and one or more further drugs with a risk of TdP.                                 | 0 | 2 | 8  | 7 | 6 |   |
| 30. Chronic heart failure and prescribed a single antidepressant with a <i>known</i> risk of TdP.                                                                                | 0 | 6 | 4  | 6 | 5 |   |
| 31. Chronic heart failure and co-prescribed an antidepressant with a <i>known</i> risk of TdP and one or more further drugs with a risk of TdP.                                  | 0 | 0 | 10 | 7 | 7 |   |
| 32. Chronic heart failure and co-prescribed an antidepressant with a <i>possible</i> risk of TdP and one or more further drugs with a risk of TdP.                               | 0 | 4 | 6  | 7 | 6 |   |
| 33. Chronic heart failure and co-prescribed an antidepressant with a <i>conditional</i> * risk of TdP and one or more further drugs with a risk of TdP. (*see evidence document) | 0 | 5 | 5  | 7 | 5 |   |
| 34. Cardiac conduction disorders (e.g., congenital long QT-Syndrome) and prescribed a single antidepressant with a <i>known</i> risk of TdP.                                     | 0 | 1 | 9  | 8 | 7 |   |
| 35. Cardiac conduction disorders and co-prescribed an antidepressant with a <i>known</i> risk of TdP and one or more further drugs with a risk of TdP.                           | 0 | 0 | 10 | 8 | 8 |   |
| 36. Cardiac conduction disorders and co-prescribed an antidepressant with a <i>possible</i> risk of TdP and one or more further drugs with a risk of TdP.                        | 0 | 1 | 9  | 7 | 6 |   |
| 37. Cardiac conduction disorders and co-prescribed an antidepressant with a <i>conditional</i> risk of TdP and one or more further drugs with a risk of TdP.                     | 0 | 2 | 8  | 7 | 6 |   |
| 38. History of recurrent hypokalaemia (<3.0 mmol/L) and prescribed a single antidepressant with a <i>known</i> risk of TdP.                                                      | 0 | 2 | 8  | 8 | 6 |   |
| 39. History of recurrent hypokalaemia (<3.0 mmol/L) and co-prescribed an antidepressant with a <i>known</i> risk of TdP and one or more further drugs with a risk of TdP.        | 0 | 0 | 10 | 8 | 7 |   |
| 40. History of recurrent hypokalaemia (<3.0 mmol/L) and co-prescribed an antidepressant with a <i>possible</i> risk of TdP and one or more further drugs with a risk of TdP.     | 0 | 0 | 10 | 7 | 6 |   |
| 41. History of recurrent hypokalaemia (<3.0 mmol/L) and co-prescribed an antidepressant with a <i>conditional</i> risk of TdP and one or more further drugs with a risk of TdP.  | 0 | 3 | 7  | 7 | 6 |   |
| <b>B. ADR Bradycardia</b>                                                                                                                                                        |   |   |    |   |   |   |
| 42. Chronic heart failure and co-prescribed an SSRI which is a strong CYP2D6-inhibitor (fluoxetine, paroxetine) and β-blocker (metoprolol, propranolol).                         | 0 | 0 | 10 | 8 | 8 | 5 |

**C. ADR Uncontrolled hypertension**

|                                                                                                                                                                                                                                                                |   |   |    |   |   |   |
|----------------------------------------------------------------------------------------------------------------------------------------------------------------------------------------------------------------------------------------------------------------|---|---|----|---|---|---|
| 43. Neither chronic heart failure nor coronary heart disease but uncontrolled hypertension stage 1 (SBP 140-159, DBP 90-99) and prescribed an antidepressant known to increase blood pressure (SNRI or bupropion or MAOI).                                     | 1 | 6 | 3  | 6 | 4 | 5 |
| 44. Neither chronic heart failure nor coronary heart disease but uncontrolled hypertension stage 2 (SBP 160-179, DBP 100-109) and prescribed an antidepressant known to increase blood pressure (SNRI or bupropion or MAOI).                                   | 0 | 3 | 7  | 7 | 5 |   |
| 45. Neither chronic heart failure nor coronary heart disease but uncontrolled hypertension stage 3 (SBP ≥ 180, DBP ≥ 110) and prescribed an antidepressant known to increase blood pressure (SNRI or bupropion or MAOI).                                       | 0 | 2 | 8  | 8 | 7 |   |
| 46. Chronic heart failure or coronary heart disease with uncontrolled hypertension stage 1 (SBP 140-159, DBP 90-99) and prescribed an antidepressant known to increase blood pressure (SNRI or bupropion or MAOI).                                             | 1 | 4 | 5  | 7 | 6 |   |
| 47. Chronic heart failure or coronary heart disease with uncontrolled hypertension stage 2 (SBP 160-179, DBP 100-109) and prescribed an antidepressant known to increase blood pressure (SNRI or bupropion or MAOI).                                           | 0 | 2 | 8  | 8 | 7 |   |
| 48. Chronic heart failure or coronary heart disease with uncontrolled hypertension stage 3 (SBP ≥ 180, DBP ≥ 110) and prescribed an antidepressant known to increase blood pressure (SNRI or bupropion or MAOI).                                               | 0 | 0 | 10 | 9 | 8 |   |
| 49. Chronic heart failure or coronary heart disease without a known history of uncontrolled hypertension prescribed a single antidepressant known to increase blood pressure (SNRI or bupropion or MAOI).                                                      | 0 | 7 | 3  | 6 | 5 |   |
| 50. Chronic heart failure or coronary heart disease without a known history of uncontrolled hypertension co-prescribed an antidepressant known to increase blood pressure (SNRI or bupropion or MAOI) with one further drug known to increase blood pressure.  | 0 | 4 | 6  | 7 | 6 |   |
| 51. Chronic heart failure or coronary heart disease without a known history of uncontrolled hypertension co-prescribed an antidepressant known to increase blood pressure (SNRI or bupropion or MAOI) with two further drugs known to increase blood pressure. | 0 | 2 | 8  | 8 | 7 |   |
| <b>D. ADR Tachycardia</b>                                                                                                                                                                                                                                      |   |   |    |   |   |   |
| 52. Neither chronic heart failure nor coronary heart disease but prescribed a TCA and has developed uncontrolled tachycardia.                                                                                                                                  | 0 | 1 | 9  | 7 | 6 | 6 |
| 53. Neither chronic heart failure nor coronary heart disease but prescribed a SNRI and has developed uncontrolled tachycardia.                                                                                                                                 | 0 | 3 | 7  | 7 | 6 |   |
| 54. Neither chronic heart failure nor coronary heart disease but prescribed a MAOI and has developed uncontrolled tachycardia.                                                                                                                                 | 0 | 1 | 9  | 8 | 6 |   |
| 55. Chronic heart failure or coronary heart disease, prescribed a TCA and has developed uncontrolled tachycardia.                                                                                                                                              | 0 | 0 | 10 | 9 | 7 |   |
| 56. Chronic heart failure or coronary heart disease, prescribed a SNRI and has developed uncontrolled tachycardia.                                                                                                                                             | 0 | 2 | 8  | 8 | 7 |   |
| 57. Chronic heart failure or coronary heart disease, prescribed a MAOI and has developed uncontrolled tachycardia.                                                                                                                                             | 0 | 1 | 8  | 9 | 7 |   |
| <b>E. ADR Gastrointestinal bleeding</b>                                                                                                                                                                                                                        |   |   |    |   |   |   |
| 58. Aged < 65 years and co-prescribed SSRI and a single of the following drugs known to increase the risk of gastrointestinal bleeding: antiplatelet or anticoagulant or NSAID (without gastrointestinal protection).                                          | 3 | 3 | 4  | 6 | 5 | 6 |
| 59. Aged < 65 years and co-prescribed SSRI and a single of the following drugs known to increase the risk of gastrointestinal bleeding: antiplatelet or anticoagulant or NSAID (with gastrointestinal protection).                                             | 4 | 6 | 0  | 4 | 4 |   |
| 60. Aged < 65 years and co-prescribed SSRI and two or more of the following drugs: antiplatelet and/or anticoagulant and/or NSAID (without gastrointestinal protection).                                                                                       | 0 | 6 | 4  | 6 | 6 |   |
| 61. Aged < 65 years and co-prescribed SSRI and two or more of the following drugs: antiplatelet and/or anticoagulant and/or NSAID (with gastrointestinal protection).                                                                                          | 2 | 5 | 3  | 6 | 5 |   |
| 62. Aged ≥ 65 years and co-prescribed SSRI and a single of the following drugs: antiplatelet or anticoagulant or NSAID (without gastrointestinal protection).                                                                                                  | 0 | 3 | 7  | 8 | 6 |   |
| 63. Aged ≥ 65 years and co-prescribed SSRI and a single of the following drugs: antiplatelet or anticoagulant or NSAID (with gastrointestinal protection).                                                                                                     | 2 | 4 | 4  | 6 | 4 |   |

|                                                                                                                                                                                                                                                                               |   |   |   |   |   |
|-------------------------------------------------------------------------------------------------------------------------------------------------------------------------------------------------------------------------------------------------------------------------------|---|---|---|---|---|
| 64. Aged ≥ 65 years and co-prescribed SSRI and two or more of the following drugs: antiplatelet and/or anticoagulant and/or NSAID (without gastrointestinal protection).                                                                                                      | 0 | 2 | 8 | 9 | 7 |
| 65. Aged ≥ 65 years and co-prescribed SSRI and two or more of the following drugs: antiplatelet and/or anticoagulant and/or NSAID (with gastrointestinal protection).                                                                                                         | 1 | 3 | 6 | 7 | 5 |
| 66. At least one risk factor (history of peptic ulcer disease, gastrointestinal bleeding or haemophilia) and prescribed SSRI (without gastrointestinal protection).                                                                                                           | 1 | 6 | 3 | 5 | 5 |
| 67. At least one risk factor (history of peptic ulcer disease, gastrointestinal bleeding or haemophilia) and prescribed SSRI (with gastrointestinal protection).                                                                                                              | 2 | 6 | 2 | 6 | 5 |
| 68. At least one risk factor (history of peptic ulcer disease, gastrointestinal bleeding or haemophilia) and co-prescribed SSRI and a single of the following drugs: antiplatelet or anticoagulant or NSAID (without gastrointestinal protection).                            | 0 | 4 | 6 | 7 | 6 |
| 69. At least one risk factor (history of peptic ulcer disease, gastrointestinal bleeding or haemophilia) and co-prescribed SSRI and a single of the following drugs: antiplatelet or anticoagulant or NSAID (with gastrointestinal protection).                               | 2 | 2 | 6 | 7 | 6 |
| 70. At least one risk factor (history of peptic ulcer disease, gastrointestinal bleeding or haemophilia) and co-prescribed SSRI and two or more of the following drugs: antiplatelet and/or anticoagulant and/or NSAID (without gastrointestinal protection).                 | 0 | 2 | 8 | 9 | 7 |
| 71. At least one risk factor (history of peptic ulcer disease, gastrointestinal bleeding or haemophilia) and co-prescribed SSRI and two or more of the following drugs: antiplatelet and/or anticoagulant and/or NSAID (with gastrointestinal protection).                    | 1 | 3 | 6 | 8 | 6 |
| 72. At least one risk factor (history of peptic ulcer disease, gastrointestinal bleeding, haemophilia or aged ≥ 65 years) and prescribed SNRI or TCA (without gastrointestinal protection).                                                                                   | 1 | 3 | 6 | 7 | 6 |
| 73. At least one risk factor (history of peptic ulcer disease, gastrointestinal bleeding, haemophilia or aged ≥ 65 years) and prescribed SNRI or TCA (with gastrointestinal protection).                                                                                      | 2 | 3 | 5 | 7 | 5 |
| 74. At least one risk factor (history of peptic ulcer disease, gastrointestinal bleeding, haemophilia or aged ≥ 65 years) and co-prescribed SNRI or TCA and a single of the following drugs: antiplatelet or anticoagulant or NSAID (without gastrointestinal protection).    | 1 | 2 | 7 | 8 | 6 |
| 75. At least one risk factor (history of peptic ulcer disease, gastrointestinal bleeding, haemophilia or aged ≥ 65 years) and co-prescribed SNRI or TCA and a single of the following drugs: antiplatelet or anticoagulant or NSAID (with gastrointestinal protection).       | 2 | 3 | 5 | 7 | 5 |
| 76. At least one risk factor (history of peptic ulcer disease, gastrointestinal bleeding, haemophilia or aged ≥ 65 years) and co-prescribed SNRI or TCA and two or more of the following drugs: antiplatelet or anticoagulant or NSAID (without gastrointestinal protection). | 1 | 1 | 8 | 9 | 8 |
| 77. At least one risk factor (history of peptic ulcer disease, gastrointestinal bleeding, haemophilia or aged ≥ 65 years) and co-prescribed SNRI or TCA and two or more of the following drugs: antiplatelet or anticoagulant or NSAID (with gastrointestinal protection).    | 2 | 1 | 7 | 8 | 7 |

#### F. ADR Bleeding

|                                                                                                                                         |   |   |   |   |   |
|-----------------------------------------------------------------------------------------------------------------------------------------|---|---|---|---|---|
| 78. History of bleeding event and co-prescribed SSRI and a single of the following drugs: anticoagulant or antiplatelet.                | 0 | 5 | 5 | 7 | 5 |
| 79. History of bleeding event and co-prescribed SSRI and two or more of the following drugs: anticoagulant and antiplatelet.            | 0 | 2 | 8 | 8 | 7 |
| 80. Stroke and co-prescribed SSRI and a single of the following drugs: anticoagulant or antiplatelet.                                   | 0 | 6 | 4 | 6 | 4 |
| 81. Stroke and co-prescribed SSRI and two or more of the following drugs: anticoagulant and antiplatelet.                               | 0 | 4 | 6 | 7 | 6 |
| 82. Dementia and co-prescribed SSRI and a single of the following drugs: anticoagulant or antiplatelet.                                 | 0 | 6 | 4 | 5 | 4 |
| 83. Dementia and co-prescribed SSRI and two or more of the following drugs: anticoagulant and antiplatelet.                             | 0 | 5 | 5 | 7 | 6 |
| 84. Aged ≥ 65 years without a known dementia and co-prescribed SSRI and a single of the following drugs: anticoagulant or antiplatelet. | 0 | 6 | 4 | 6 | 5 |

|                                                                                                                                                                                                  |    |   |   |   |   |   |
|--------------------------------------------------------------------------------------------------------------------------------------------------------------------------------------------------|----|---|---|---|---|---|
| 85. Aged ≥ 65 years without a known dementia and co-prescribed SSRI and two or more of the following drugs: anticoagulant and antiplatelet.                                                      | 0  | 3 | 7 | 7 | 6 |   |
| <b>G. ADR Constipation</b>                                                                                                                                                                       |    |   |   |   |   |   |
| 86. Prescribed TCA < 100 mg/day and patient has persistent constipation.                                                                                                                         | 1  | 7 | 2 | 5 | 5 | 4 |
| 87. Prescribed TCA ≥ 100 mg/day but < 200 mg/day and patient has persistent constipation.                                                                                                        | 0  | 7 | 3 | 6 | 5 |   |
| 88. Prescribed TCA ≥ 200 mg/day and patient has persistent constipation.                                                                                                                         | 0  | 2 | 8 | 7 | 6 |   |
| 89. Prescribed a TCA without further drugs known to have constipating effects*, and patient has persistent constipation. (*see evidence document)                                                | 1  | 2 | 7 | 7 | 6 |   |
| 90. Prescribed a TCA and one further drug known to have constipating effects, and patient has persistent constipation.                                                                           | 0  | 1 | 9 | 7 | 6 |   |
| 91. Prescribed a TCA and two further drugs known to have constipating effects, and patient has persistent constipation.                                                                          | 0  | 1 | 9 | 8 | 7 |   |
| 92. Aged ≥ 65 years without a known history of persistent constipation, prescribed a TCA and one further non-anticholinergic drug (e.g. opioids, verapamil) known to have constipating effects.  | 1  | 5 | 4 | 6 | 5 |   |
| 93. Aged ≥ 65 years without a known history of persistent constipation, prescribed a TCA and two further non-anticholinergic drugs (e.g. opioids, verapamil) known to have constipating effects. | 0  | 3 | 7 | 7 | 6 |   |
| 94. Prescribed a SNRI without further drugs known to have constipating effects, and patient has persistent constipation.                                                                         | 1  | 8 | 1 | 5 | 4 |   |
| 95. Prescribed a SNRI and one further drug known to have constipating effects, and patient has persistent constipation.                                                                          | 1  | 8 | 1 | 5 | 5 |   |
| 96. Prescribed a SNRI and two further drugs known to have constipating effects, and patient has persistent constipation.                                                                         | 1  | 6 | 3 | 6 | 6 |   |
| <b>H. ADR Cognitive impairment/decline</b>                                                                                                                                                       |    |   |   |   |   |   |
| 97. Cognitive impairment and prescribed TCA in doses < 50 mg/day.                                                                                                                                | 1  | 7 | 2 | 6 | 4 | 6 |
| 98. Cognitive impairment and prescribed TCA in doses ≥ 50 mg/day but < 100 mg/day.                                                                                                               | 1  | 2 | 7 | 7 | 6 |   |
| 99. Cognitive impairment and prescribed TCA ≥ 100 mg/day but < 200 mg/day.                                                                                                                       | 0  | 1 | 9 | 8 | 6 |   |
| 100. Cognitive impairment and prescribed TCA ≥ 200 mg/day.                                                                                                                                       | 0  | 1 | 9 | 9 | 7 |   |
| 101. Cognitive impairment, prescribed a TCA and no further anticholinergic drugs, and the total anticholinergic burden is 3.                                                                     | 0  | 2 | 8 | 8 | 5 |   |
| 102. Cognitive impairment, prescribed a TCA with further drugs, and the total anticholinergic burden is 4                                                                                        | 0  | 2 | 8 | 8 | 6 |   |
| 103. Cognitive impairment, prescribed a TCA with further drugs, and the total anticholinergic burden is ≥ 5.                                                                                     | 0  | 1 | 9 | 9 | 8 |   |
| 104. Cognitive impairment, prescribed paroxetine or opipramol and no further anticholinergic drugs, and the total anticholinergic burden is 2.                                                   | 1  | 8 | 1 | 4 | 3 |   |
| 105. Cognitive impairment, prescribed paroxetine or opipramol with further drugs, and the total anticholinergic burden is 3.                                                                     | 0  | 7 | 3 | 5 | 4 |   |
| 106. Cognitive impairment, prescribed paroxetine or opipramol with further drugs, and the total anticholinergic burden is 4.                                                                     | 0  | 6 | 4 | 6 | 5 |   |
| 107. Cognitive impairment, prescribed paroxetine or opipramol with further drugs, and the total anticholinergic burden is ≥ 5.                                                                   | 0  | 1 | 9 | 8 | 6 |   |
| 108. Cognitive impairment and prescribed 1 DDD citalopram daily.                                                                                                                                 | 10 | 0 | 0 | 3 | 2 |   |
| 109. Cognitive impairment and prescribed ≥ 1,5 DDD citalopram daily.                                                                                                                             | 3  | 7 | 0 | 4 | 3 |   |
| 110. Cognitive impairment and prescribed 1 DDD SSRI other than citalopram and paroxetine.                                                                                                        | 8  | 2 | 0 | 3 | 2 |   |
| 111. Cognitive impairment and prescribed ≥ 1,5 DDD SSRI other than citalopram and paroxetine.                                                                                                    | 3  | 6 | 1 | 4 | 3 |   |
| 112. Cognitive impairment and prescribed 1 DDD mirtazapine daily.                                                                                                                                | 8  | 2 | 0 | 3 | 2 |   |
| 113. Cognitive impairment and prescribed ≥ 1,5 DDD mirtazapine daily.                                                                                                                            | 4  | 6 | 0 | 4 | 3 |   |
| 114. Cognitive impairment and prescribed trazodone.                                                                                                                                              | 4  | 5 | 1 | 4 | 4 |   |
| 115. Cognitive impairment and prescribed SNRI (venlafaxine, duloxetine).                                                                                                                         | 4  | 5 | 1 | 4 | 3 |   |
| <b>I. ADR Delirium</b>                                                                                                                                                                           |    |   |   |   |   |   |

|                                                                                                                                                                                                                           |   |   |    |   |   |   |
|---------------------------------------------------------------------------------------------------------------------------------------------------------------------------------------------------------------------------|---|---|----|---|---|---|
| 116. At least one risk factor (cognitive impairment, dementia or history of delirium) and prescribed TCA and no further drugs known to induce delirium.                                                                   | 0 | 9 | 1  | 5 | 4 | 7 |
| 117. At least one risk factor (cognitive impairment, dementia or history of delirium) and prescribed TCA and one further non-anticholinergic drug known to induce delirium (e.g. benzodiazepines, opioids).               | 0 | 5 | 5  | 7 | 5 |   |
| 118. At least one risk factor (cognitive impairment, dementia or history of delirium) and prescribed TCA and two further non-anticholinergic drugs known to induce delirium (e.g. benzodiazepines, opioids).              | 0 | 2 | 8  | 8 | 6 |   |
| 119. Aged ≥ 65 years and prescribed TCA and one further non-anticholinergic drug known to induce delirium (e.g. benzodiazepines, opioids).                                                                                | 0 | 6 | 4  | 6 | 5 |   |
| 120. Aged ≥ 65 years and prescribed TCA and two further non-anticholinergic drugs known to induce delirium (e.g. benzodiazepines, opioids).                                                                               | 0 | 3 | 7  | 8 | 6 |   |
| 121. At least one risk factor (cognitive impairment, dementia or history of delirium) and prescribed TCA with further anticholinergic drugs, and the total anticholinergic burden is 4.                                   | 0 | 3 | 7  | 8 | 6 |   |
| 122. At least one risk factor (cognitive impairment, dementia or history of delirium) and prescribed TCA with further anticholinergic drugs, and the total anticholinergic burden is ≥ 5.                                 | 0 | 1 | 9  | 9 | 7 |   |
| <b>J. ADR Serotonin syndrome</b>                                                                                                                                                                                          |   |   |    |   |   |   |
| 123. Co-prescribed SSRI/SNRI/TCA (clomipramine, imipramine) and MAOI.                                                                                                                                                     | 0 | 3 | 7  | 9 | 7 | 7 |
| 124. Co-prescribed SSRI with one further serotonergic drug* other than MAOI. (*see evidence document)                                                                                                                     | 1 | 5 | 4  | 6 | 4 |   |
| 125. Co-prescribed SSRI with two further serotonergic drugs other than MAOI.                                                                                                                                              | 0 | 3 | 7  | 7 | 5 |   |
| 126. Co-prescribed SSRI with three further serotonergic drugs other than MAOI.                                                                                                                                            | 0 | 1 | 9  | 8 | 6 |   |
| 127. Co-prescribed SNRI with one further serotonergic drug other than MAOI.                                                                                                                                               | 1 | 6 | 3  | 6 | 4 |   |
| 128. Co-prescribed SNRI with two further serotonergic drugs other than MAOI.                                                                                                                                              | 0 | 6 | 4  | 6 | 5 |   |
| 129. Co-prescribed SNRI with three further serotonergic drugs other than MAOI.                                                                                                                                            | 0 | 1 | 9  | 8 | 6 |   |
| 130. Co-prescribed MAOI with one further serotonergic drug other than SSRI/SNRI/TCA (clomipramine, imipramine).                                                                                                           | 0 | 3 | 7  | 8 | 6 |   |
| 131. Co-prescribed MAOI with two further serotonergic drugs other than SSRI/SNRI/TCA (clomipramine, imipramine).                                                                                                          | 0 | 2 | 8  | 9 | 7 |   |
| 132. Co-prescribed MAOI with three further serotonergic drugs other than SSRI/SNRI/TCA (clomipramine, imipramine).                                                                                                        | 0 | 0 | 10 | 9 | 8 |   |
| 133. Co-prescribed a TCA (clomipramine/imipramine) with one further serotonergic drug other than MAOI.                                                                                                                    | 0 | 8 | 2  | 6 | 5 |   |
| 134. Co-prescribed a TCA (clomipramine/imipramine) with two further serotonergic drugs other than MAOI.                                                                                                                   | 0 | 6 | 4  | 6 | 5 |   |
| 135. Co-prescribed a TCA (clomipramine/imipramine) with three further serotonergic drugs other than MAOI.                                                                                                                 | 0 | 3 | 7  | 7 | 6 |   |
| <b>K. ADR Stroke</b>                                                                                                                                                                                                      |   |   |    |   |   |   |
| 136. Patient with a history of stroke is prescribed an antidepressant other than SSRI or TCA.                                                                                                                             | 4 | 6 | 0  | 4 | 3 | 8 |
| 137. Patient with a history of stroke is prescribed SSRI.                                                                                                                                                                 | 6 | 3 | 1  | 3 | 3 |   |
| 138. Patient with a history of stroke is prescribed TCA.                                                                                                                                                                  | 1 | 5 | 4  | 6 | 5 |   |
| 139. Aged < 65 years at high risk of cardiovascular events is prescribed SSRI.                                                                                                                                            | 2 | 8 | 0  | 4 | 4 |   |
| 140. Aged ≥ 65 years at high risk of cardiovascular events is prescribed SSRI.                                                                                                                                            | 2 | 8 | 0  | 5 | 5 |   |
| <b>L. ADR Falls and fall-related injuries</b>                                                                                                                                                                             |   |   |    |   |   |   |
| 141. Aged ≥ 65 years and prescribed one single antidepressant with sedating, anticholinergic or orthostatic properties (TCA or mirtazapine or trazodone).                                                                 | 0 | 7 | 3  | 5 | 5 | 7 |
| 142. Aged ≥ 65 years and co-prescribed an antidepressant with sedating, anticholinergic or orthostatic properties (TCA or mirtazapine or trazodone) with one further fall-risk increasing drug*. (*see evidence document) | 0 | 3 | 7  | 7 | 6 |   |

|                                                                                                                                                                                                               |   |   |   |   |   |
|---------------------------------------------------------------------------------------------------------------------------------------------------------------------------------------------------------------|---|---|---|---|---|
| 143. Aged ≥ 65 years and co-prescribed an antidepressant with sedating, anticholinergic or orthostatic properties (TCA or mirtazapine or trazodone) with two or more further fall-risk increasing drugs.      | 0 | 1 | 9 | 8 | 7 |
| 144. Aged ≥ 65 years and prescribed one single antidepressant with activating properties (SSRI or SNRI).                                                                                                      | 2 | 8 | 0 | 4 | 4 |
| 145. Aged ≥ 65 years and co-prescribed an antidepressant with activating properties (SSRI or SNRI) with one further fall-risk increasing drug.                                                                | 1 | 7 | 2 | 6 | 5 |
| 146. Aged ≥ 65 years and co-prescribed an antidepressant with activating properties (SSRI or SNRI) with two or more further fall-risk increasing drugs.                                                       | 1 | 1 | 8 | 8 | 7 |
| 147. History of fall and prescribed one single antidepressant with sedating, anticholinergic or orthostatic properties (TCA or mirtazapine or trazodone).                                                     | 0 | 4 | 6 | 7 | 5 |
| 148. History of fall and co-prescribed an antidepressant with sedating, anticholinergic or orthostatic properties (TCA or mirtazapine or trazodone) with one further fall-risk increasing drug.               | 0 | 1 | 9 | 8 | 7 |
| 149. History of fall and co-prescribed an antidepressant with sedating, anticholinergic or orthostatic properties (TCA or mirtazapine or trazodone) with two or more further fall-risk increasing drugs.      | 0 | 1 | 9 | 9 | 7 |
| 150. History of fall and prescribed one single antidepressant with activating properties (SSRI or SNRI).                                                                                                      | 2 | 5 | 3 | 6 | 4 |
| 151. History of fall and co-prescribed an antidepressant with activating properties (SSRI or SNRI) with one further fall-risk increasing drug.                                                                | 1 | 3 | 6 | 7 | 5 |
| 152. History of fall and co-prescribed an antidepressant with activating properties (SSRI or SNRI) with two or more further fall-risk increasing drugs.                                                       | 1 | 2 | 7 | 8 | 6 |
| 153. Cognitive impairment and prescribed one single antidepressant with sedating, anticholinergic or orthostatic properties (TCA or mirtazapine or trazodone).                                                | 0 | 2 | 8 | 8 | 6 |
| 154. Cognitive impairment and co-prescribed an antidepressant with sedating, anticholinergic or orthostatic properties (TCA or mirtazapine or trazodone) with one further fall-risk increasing drug.          | 0 | 2 | 8 | 8 | 7 |
| 155. Cognitive impairment and co-prescribed an antidepressant with sedating, anticholinergic or orthostatic properties (TCA or mirtazapine or trazodone) with two or more further fall-risk increasing drugs. | 0 | 1 | 9 | 9 | 8 |
| 156. Cognitive impairment and prescribed one single antidepressant with activating properties (SSRI or SNRI).                                                                                                 | 3 | 6 | 1 | 6 | 3 |
| 157. Cognitive impairment and co-prescribed an antidepressant with activating properties (SSRI or SNRI) with one further fall-risk increasing drug.                                                           | 1 | 2 | 7 | 7 | 5 |
| 158. Cognitive impairment and co-prescribed an antidepressant with activating properties (SSRI or SNRI) with two or more further fall-risk increasing drugs.                                                  | 1 | 2 | 7 | 8 | 6 |
| 159. At least one risk factor for falls (aged ≥ 65 years, history of fall or cognitive impairment) and co-prescribed SSRI and benzodiazepine/Z-hypnotic.                                                      | 1 | 0 | 9 | 8 | 7 |
| 160. At least one risk factor for falls (aged ≥ 65 years, history of fall or cognitive impairment) and co-prescribed SSRI and benzodiazepin/Z-hypnotic ≤ 4 weeks.                                             | 1 | 0 | 9 | 8 | 7 |
| 161. At least one risk factor for falls (aged ≥ 65 years, history of fall or cognitive impairment) and co-prescribed SSRI and benzodiazepin/Z-hypnotic > 4 weeks.                                             | 1 | 0 | 9 | 9 | 7 |
| 162. Known osteoporosis and prescribed SSRI.                                                                                                                                                                  | 2 | 6 | 2 | 6 | 4 |
| 163. History of low impact fracture and prescribed SSRI.                                                                                                                                                      | 0 | 7 | 3 | 6 | 4 |
| 164. Aged ≥ 65 years without known osteoporosis and prescribed SSRI.                                                                                                                                          | 5 | 5 | 0 | 4 | 3 |
| 165. Aged ≥ 75 years without known osteoporosis and prescribed SSRI.                                                                                                                                          | 2 | 7 | 1 | 5 | 6 |

**M. ADR Orthostatic hypotension/dizziness**



|                                                                                                                                                                                                                                   |   |   |   |   |   |   |   |
|-----------------------------------------------------------------------------------------------------------------------------------------------------------------------------------------------------------------------------------|---|---|---|---|---|---|---|
| 166. Aged < 65 years, prescribed an antidepressant with an increased risk of orthostatic hypotension (TCA or trazodone or MAOI) and has developed persistent orthostatic hypotension/dizziness.                                   | 1 | 1 | 8 | 7 | 5 | 6 |   |
| 167. Aged ≥ 65 years, prescribed an antidepressant with an increased risk of orthostatic hypotension (TCA or trazodone or MAOI) and has developed persistent orthostatic hypotension/dizziness.                                   | 0 | 1 | 9 | 9 | 7 |   |   |
| 168. Aged ≥ 65 years without a known orthostatic hypotension/dizziness, prescribed an antidepressant with an increased risk of orthostatic hypotension (TCA or trazodone or MAOI).                                                | 1 | 9 | 0 | 6 | 5 |   |   |
| 169. Aged ≥ 65 years without a known orthostatic hypotension/dizziness, co-prescribed an antidepressant (TCA or trazodone or MAOI) with one further drug with known blood pressure lowering effect*. (*see evidence document)     | 1 | 2 | 7 | 7 | 5 |   |   |
| 170. Aged ≥ 65 years without a known orthostatic hypotension/dizziness, co-prescribed an antidepressant (TCA or trazodone or MAOI) with two or more further drugs with known blood pressure lowering effect.                      | 1 | 0 | 9 | 8 | 6 |   |   |
| 171. Aged < 65 years, prescribed an antidepressant with a lower risk of orthostatic hypotension (SSRI or SNRI or mirtazapine) and has developed persistent orthostatic hypotension/dizziness.                                     | 0 | 6 | 4 | 6 | 4 |   |   |
| 172. Aged ≥ 65 years, prescribed an antidepressant with a lower risk of orthostatic hypotension (SSRI or SNRI or mirtazapine) and has developed persistent orthostatic hypotension/dizziness.                                     | 0 | 2 | 8 | 7 | 6 |   |   |
| 173. Aged ≥ 65 years without a known orthostatic hypotension/dizziness, prescribed an antidepressant with a lower risk of orthostatic hypotension (SSRI or SNRI or mirtazapine).                                                  | 7 | 3 | 0 | 3 | 3 |   |   |
| 174. Aged ≥ 65 years without a known orthostatic hypotension/dizziness, co-prescribed an antidepressant (SSRI or SNRI or mirtazapine) with one further drug with known blood pressure lowering effect.                            | 2 | 6 | 2 | 6 | 5 |   |   |
| 175. Aged ≥ 65 years without a known orthostatic hypotension/dizziness, co-prescribed an antidepressant (SSRI or SNRI or mirtazapine) with two or more further drugs with known blood pressure lowering effect.                   | 2 | 0 | 8 | 7 | 6 |   |   |
| <b>N. ADR Hyponatremia</b>                                                                                                                                                                                                        |   |   |   |   |   |   |   |
| 176. Prescribed an antidepressant with an increased risk of hyponatremia (SSRI or SNRI) with current or recent hyponatremia (130-134 mmol/l).                                                                                     | 0 | 6 | 4 | 6 | 6 |   | 6 |
| 177. Prescribed an antidepressant with a moderate or low risk of hyponatremia (TCA or mirtazapine or others) with current or recent hyponatremia (130-134 mmol/l).                                                                | 2 | 7 | 1 | 5 | 4 |   |   |
| 178. Prescribed an antidepressant with an increased risk of hyponatremia (SSRI or SNRI) with current or recent hyponatremia (<130 mmol/l).                                                                                        | 0 | 3 | 7 | 7 | 7 |   |   |
| 179. Prescribed an antidepressant with a moderate or low risk of hyponatremia (TCA or mirtazapine or others) with current or recent hyponatremia (<130 mmol/l).                                                                   | 2 | 2 | 6 | 7 | 5 |   |   |
| 180. Aged ≥ 65 years without a known history of hyponatremia, prescribed an antidepressant with an increased risk of hyponatremia (SSRI or SNRI).                                                                                 | 1 | 9 | 0 | 5 | 4 |   |   |
| 181. Aged ≥ 65 years without a known history of hyponatremia, co-prescribed an antidepressant with an increased risk of hyponatremia (SSRI or SNRI) with one further drug known to cause hyponatremia*. (*see evidence document). | 1 | 6 | 3 | 6 | 5 |   |   |
| 182. Aged ≥ 65 years without a known history of hyponatremia, co-prescribed an antidepressant with an increased risk of hyponatremia (SSRI or SNRI) with two or more further drugs known to cause hyponatremia.                   | 1 | 2 | 7 | 7 | 6 |   |   |
| 183. Aged ≥ 65 years without a known history of hyponatremia, prescribed an antidepressant with a moderate or low risk of hyponatremia (TCA or mirtazapine or others).                                                            | 3 | 7 | 0 | 4 | 3 |   |   |
| 184. Aged ≥ 65 years without a known history of hyponatremia, co-prescribed an antidepressant with a moderate or low risk of hyponatremia (TCA or mirtazapine or others) with one further drug known to cause hyponatremia.       | 1 | 7 | 2 | 5 | 4 |   |   |

|                                                                                                                                                                                                                                      |   |    |    |   |   |   |
|--------------------------------------------------------------------------------------------------------------------------------------------------------------------------------------------------------------------------------------|---|----|----|---|---|---|
| 185. Aged ≥ 65 years without a known history of hyponatremia, co-prescribed an antidepressant with a moderate or low risk of hyponatremia (TCA or mirtazapine or others) with two or more further drugs known to cause hyponatremia. | 1 | 5  | 4  | 6 | 5 |   |
| <b>O. ADR Hepatic Injury</b>                                                                                                                                                                                                         |   |    |    |   |   |   |
| 186. Prescribed an antidepressant other than agomelatine and has developed elevated serum transaminase levels (> 3 times the upper normal range).                                                                                    | 0 | 6  | 4  | 6 | 3 | 6 |
| 187. Prescribed agomelatine and has developed elevated serum transaminase levels (> 3 times the upper normal range).                                                                                                                 | 0 | 0  | 10 | 8 | 5 |   |
| 188. Hepatic impairment and prescribed agomelatine.                                                                                                                                                                                  | 0 | 0  | 10 | 9 | 7 |   |
| <b>P. ADR Metabolic disturbances/weight gain/weight loss</b>                                                                                                                                                                         |   |    |    |   |   |   |
| 189. Diabetes mellitus and prescribed TCA.                                                                                                                                                                                           | 2 | 5  | 3  | 5 | 5 | 5 |
| 190. Diabetes mellitus and prescribed mirtazapine.                                                                                                                                                                                   | 2 | 4  | 4  | 5 | 4 |   |
| 191. Prescribed TCA and has BMI 25 to < 30 kg/m <sup>2</sup> .                                                                                                                                                                       | 3 | 6  | 1  | 5 | 4 |   |
| 192. Prescribed mirtazapine and has BMI 25 to < 30 kg/m <sup>2</sup> .                                                                                                                                                               | 2 | 6  | 2  | 5 | 4 |   |
| 193. Prescribed TCA and has BMI ≥ 30 kg/m <sup>2</sup> .                                                                                                                                                                             | 2 | 5  | 3  | 5 | 5 |   |
| 194. Prescribed mirtazapine and has BMI ≥ 30 kg/m <sup>2</sup> .                                                                                                                                                                     | 1 | 6  | 3  | 6 | 5 |   |
| 195. Prescribed bupropion and has BMI < 18,5 kg/m <sup>2</sup> .                                                                                                                                                                     | 2 | 7  | 1  | 5 | 4 |   |
| <b>Q. ADR Hypoglycemia</b>                                                                                                                                                                                                           |   |    |    |   |   |   |
| 196. Prescribed SSRI and has recurrent hypoglycemia.                                                                                                                                                                                 | 2 | 2  | 6  | 7 | 4 | 6 |
| <b>R. ADR Voiding disorders</b>                                                                                                                                                                                                      |   |    |    |   |   |   |
| 197. History of voiding disorders and prescribed TCA < 100 mg/day.                                                                                                                                                                   | 0 | 7  | 3  | 6 | 4 | 5 |
| 198. History of voiding disorders and prescribed TCA ≥ 100 mg/day, but < 200 mg/day.                                                                                                                                                 | 0 | 3  | 7  | 7 | 5 |   |
| 199. History of voiding disorders and prescribed TCA ≥ 200 mg/day.                                                                                                                                                                   | 0 | 0  | 10 | 8 | 6 |   |
| 200. History of voiding disorders, prescribed TCA and no further anticholinergic drugs, and the total anticholinergic burden is 3.                                                                                                   | 0 | 5  | 5  | 7 | 5 |   |
| 201. History of voiding disorders, prescribed TCA with further drugs, and the total anticholinergic burden is 4.                                                                                                                     | 0 | 2  | 8  | 7 | 6 |   |
| 202. History of voiding disorders, prescribed TCA with further drugs, and the total anticholinergic burden is ≥ 5.                                                                                                                   | 0 | 1  | 9  | 8 | 7 |   |
| 203. History of voiding disorders, prescribed paroxetine or opipramol and no further anticholinergic drugs, and the total anticholinergic burden is 2.                                                                               | 0 | 10 | 0  | 5 | 4 |   |
| 204. History of voiding disorders, prescribed paroxetine or opipramol with further drugs, and the total anticholinergic burden is 3.                                                                                                 | 0 | 6  | 4  | 6 | 5 |   |
| 205. History of voiding disorders, prescribed paroxetine or opipramol with further drugs, and the total anticholinergic burden is 4.                                                                                                 | 0 | 1  | 9  | 8 | 6 |   |
| 206. History of voiding disorders, prescribed paroxetine or opipramol with further drugs, and the total anticholinergic burden is ≥ 5.                                                                                               | 0 | 0  | 10 | 9 | 6 |   |
| 207. History of voiding disorders, prescribed SNRI or NRI.                                                                                                                                                                           | 1 | 5  | 4  | 6 | 4 |   |
| <b>S. ADR Glaucoma</b>                                                                                                                                                                                                               |   |    |    |   |   |   |
| 208. Angle closure glaucoma and prescribed TCA < 100 mg/day.                                                                                                                                                                         | 4 | 4  | 2  | 5 | 3 | 6 |
| 209. Angle closure glaucoma and prescribed TCA ≥ 100 mg/day but < 200 mg/day.                                                                                                                                                        | 1 | 6  | 3  | 6 | 5 |   |
| 210. Angle closure glaucoma and prescribed TCA ≥ 200 mg/day.                                                                                                                                                                         | 0 | 6  | 4  | 6 | 6 |   |
| 211. Angle closure glaucoma, prescribed TCA and no further anticholinergic drugs, and the total anticholinergic burden is 3.                                                                                                         | 1 | 6  | 3  | 5 | 4 |   |
| 212. Angle closure glaucoma, prescribed TCA with further drugs, and the total anticholinergic burden is 4.                                                                                                                           | 0 | 7  | 3  | 6 | 6 |   |
| 213. Angle closure glaucoma, prescribed TCA with further drugs, and the total anticholinergic burden is ≥ 5.                                                                                                                         | 0 | 4  | 6  | 7 | 6 |   |
| 214. Angle closure glaucoma, prescribed paroxetine or opipramol and no further anticholinergic drugs, and the total anticholinergic burden is 2.                                                                                     | 4 | 6  | 0  | 4 | 3 |   |

|                                                                                                                                              |   |   |    |   |   |   |
|----------------------------------------------------------------------------------------------------------------------------------------------|---|---|----|---|---|---|
| 215. Angle closure glaucoma, prescribed paroxetine or opipramol with further drugs, and the total anticholinergic burden is 3.               | 0 | 8 | 2  | 6 | 5 |   |
| 216. Angle closure glaucoma, prescribed paroxetine or opipramol with further drugs, and the total anticholinergic burden is 4.               | 0 | 7 | 3  | 6 | 5 |   |
| 217. Angle closure glaucoma, prescribed paroxetine or opipramol with further drugs, and the total anticholinergic burden is $\geq 5$ .       | 0 | 2 | 8  | 7 | 6 |   |
| 218. Patient with an increased risk of angle closure glaucoma and prescribed SNRI.                                                           | 4 | 6 | 0  | 4 | 3 |   |
| 219. Patient with an increased risk of angle closure glaucoma and prescribed SSRI other than paroxetine.                                     | 7 | 2 | 1  | 3 | 2 |   |
| <b>T. ADR Sleep disturbances</b>                                                                                                             |   |   |    |   |   |   |
| 220. Prescribed an antidepressant with activating properties (SSRI or SNRI or MAOI or bupropion) and has persistent sleeping disturbances.   | 0 | 0 | 10 | 7 | 5 | 6 |
| 221. Prescribed an antidepressant with non-activating properties (TCA or mirtazapine or trazodone) and has persistent sleeping disturbances. | 2 | 6 | 2  | 5 | 4 |   |
| <b>U. ADR Sexual dysfunction</b>                                                                                                             |   |   |    |   |   |   |
| 222. Prescribed SSRI or SNRI and has developed sexual dysfunction.                                                                           | 1 | 1 | 8  | 8 | 6 | 5 |
